# Supplementary material for: Novel pyrazole functionalized phthalocyanines and their first row transition metal complexes
Source: Royal Society of Chemistry journal article supplement (doi:10.1039/b9nj00485h), 2010-01-01

## Supporting Information

### Compound 1a

<sup>1</sup>H-NMR spectrum (assignment according to the numbering in the article):

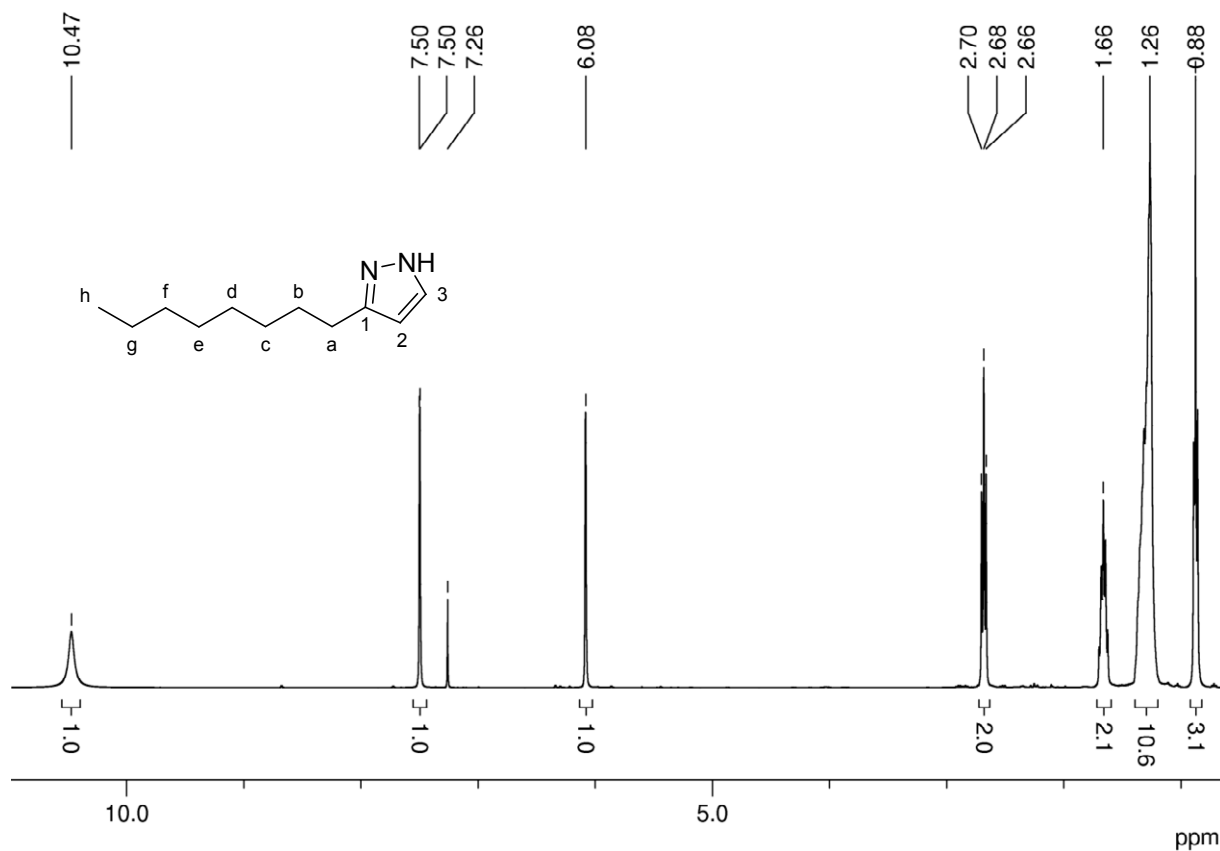

<sup>13</sup>C-NMR spectrum (assignment according to the numbering in the article):

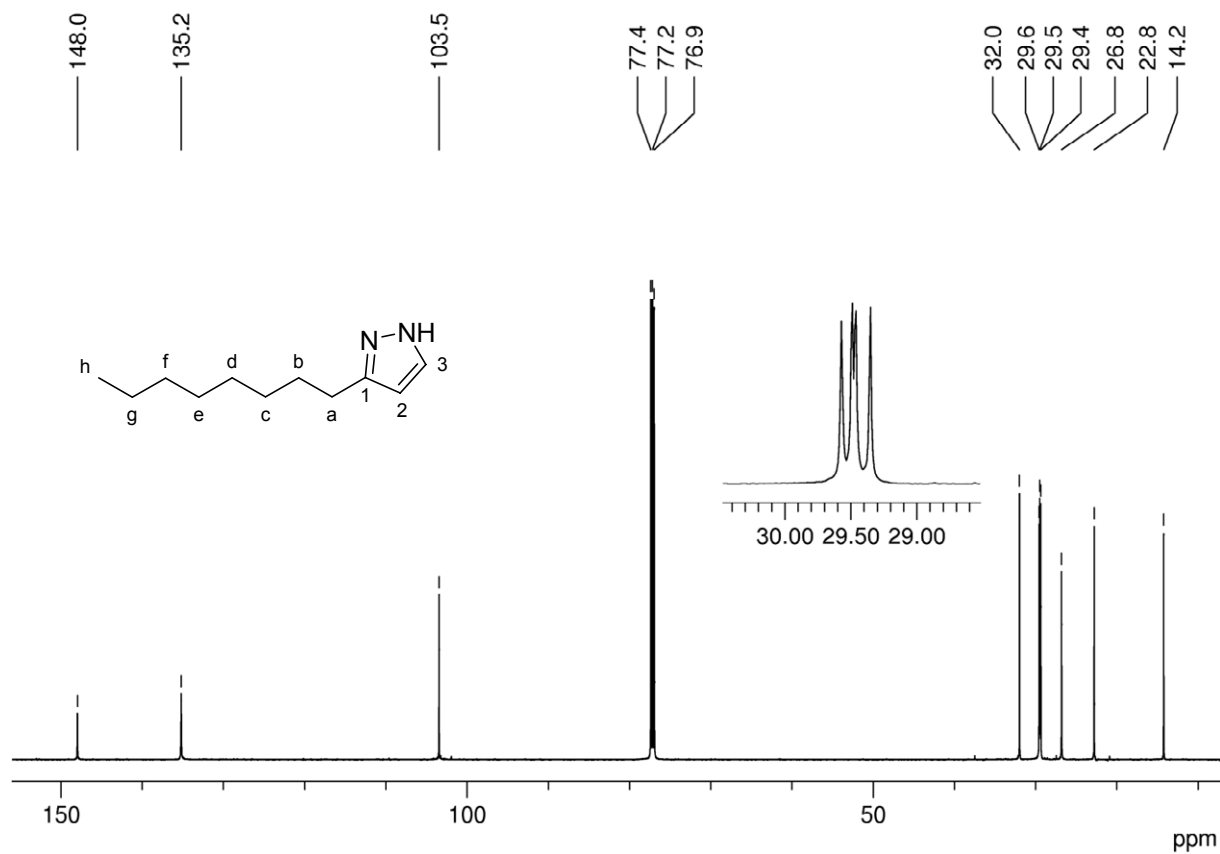

### Compound 3a

<sup>1</sup>H-NMR spectrum (assignment according to the numbering in the article):

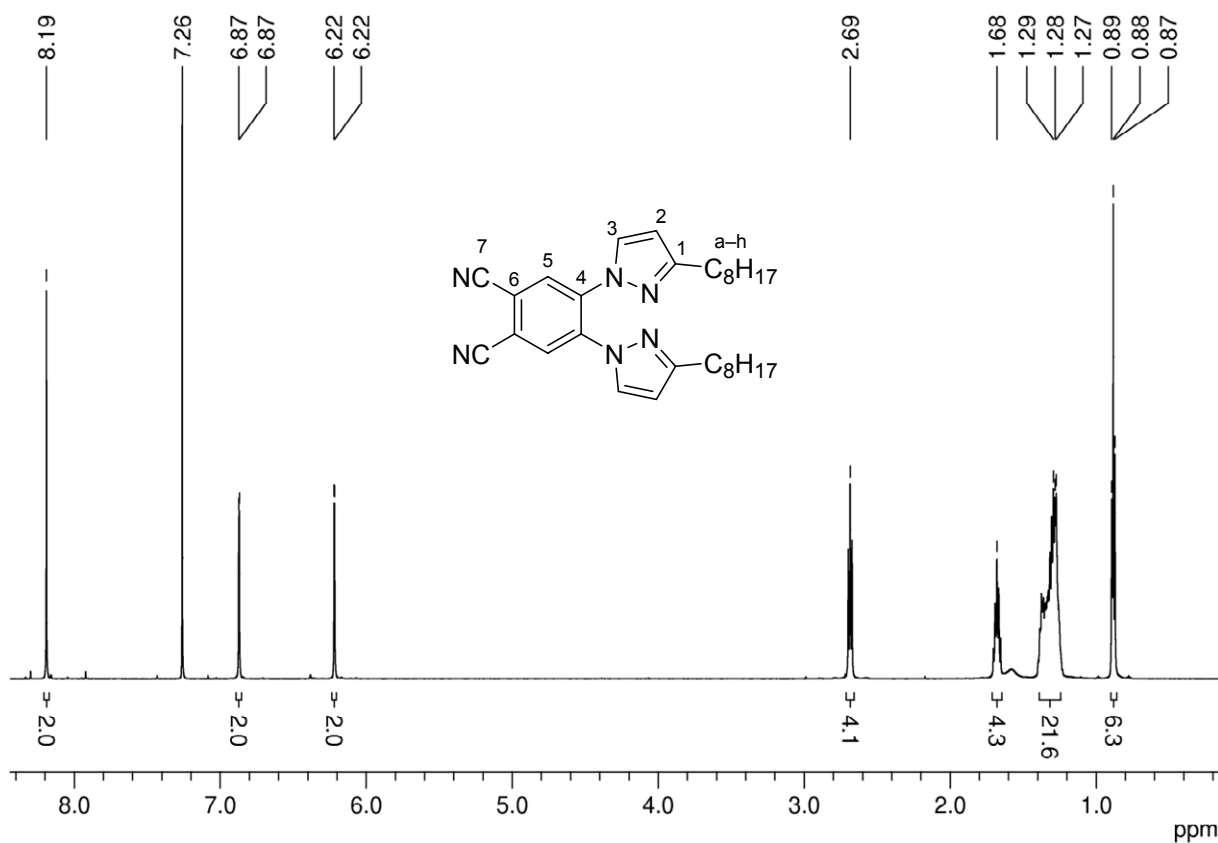

<sup>13</sup>C-NMR spectrum (assignment according to the numbering in the article):

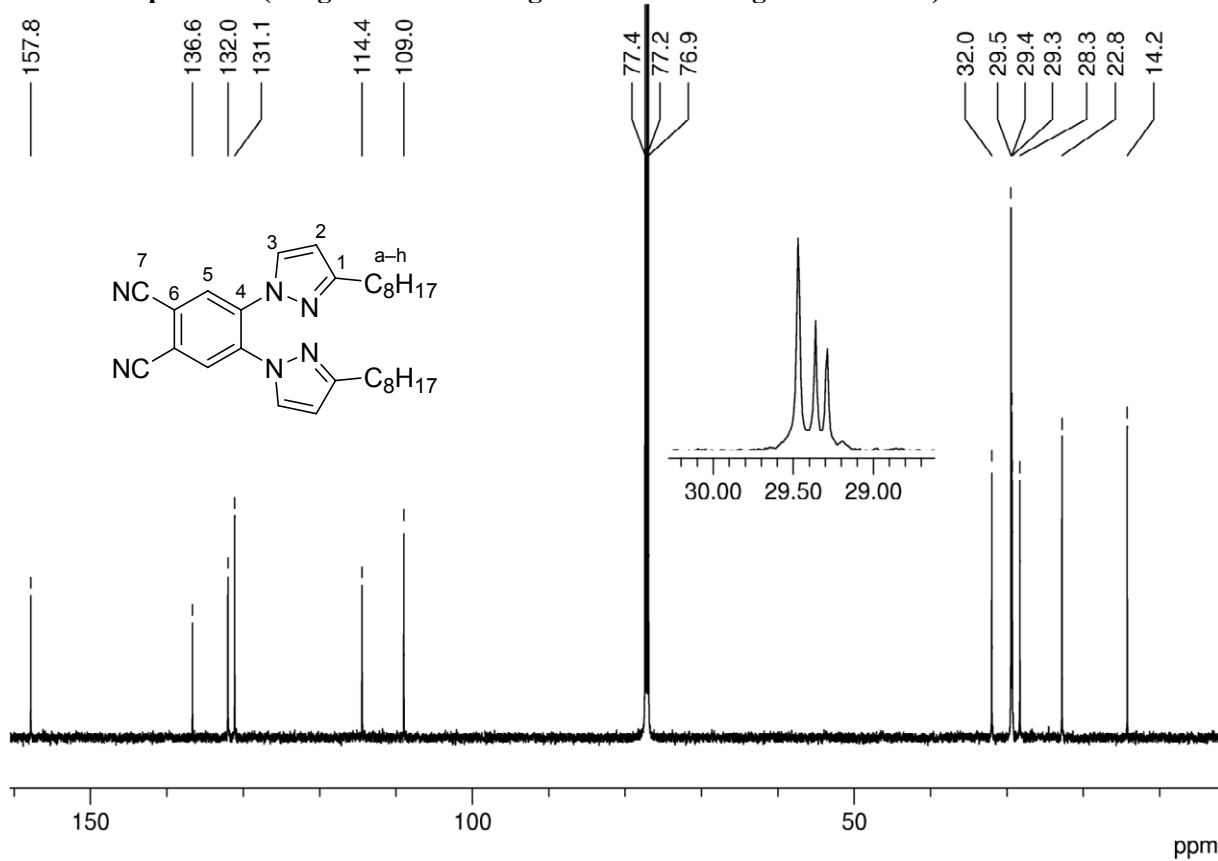

### Compound 3b

<sup>1</sup>H-NMR spectrum (assignment according to the numbering in the article):

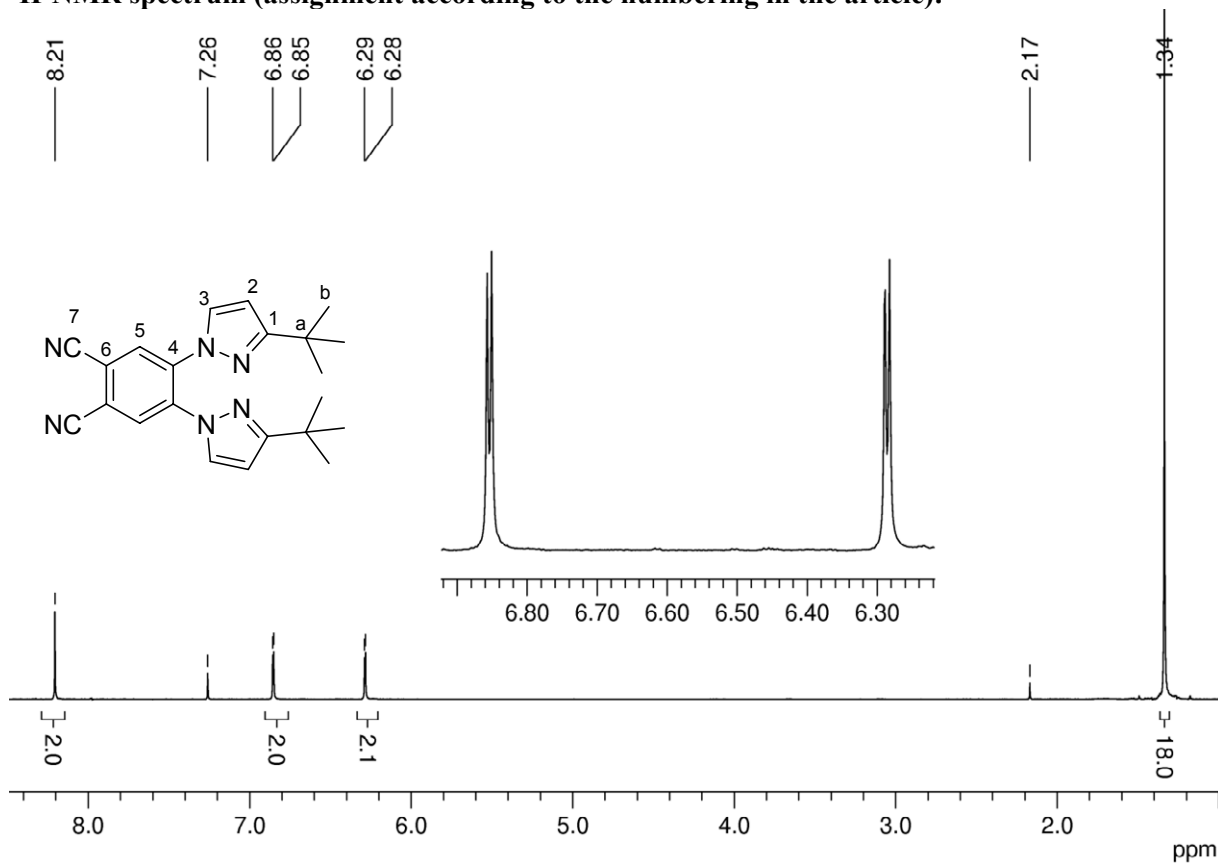

<sup>13</sup>C-NMR spectrum (assignment according to the numbering in the article):

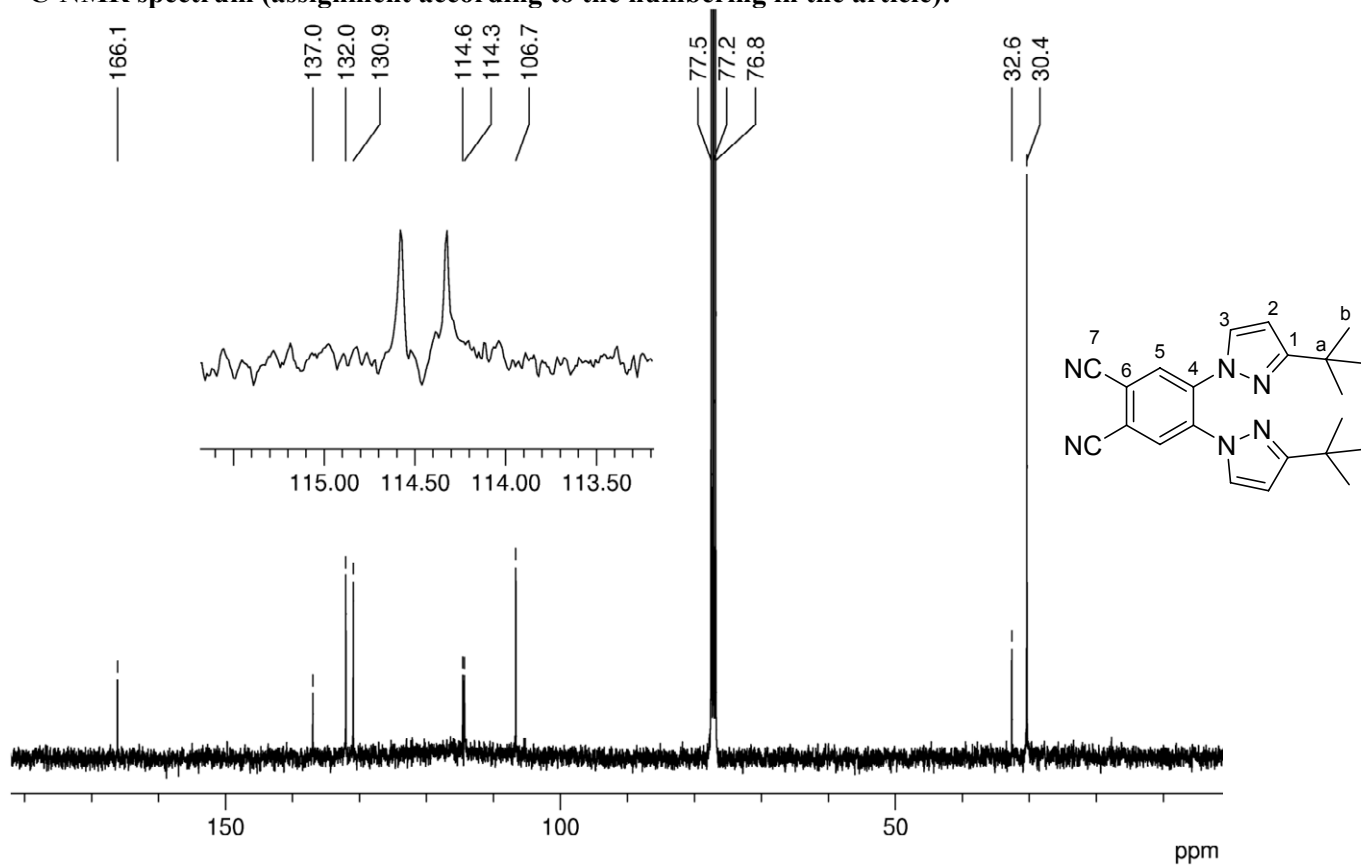

**Compound 4a**

**<sup>1</sup>H-NMR spectrum:**

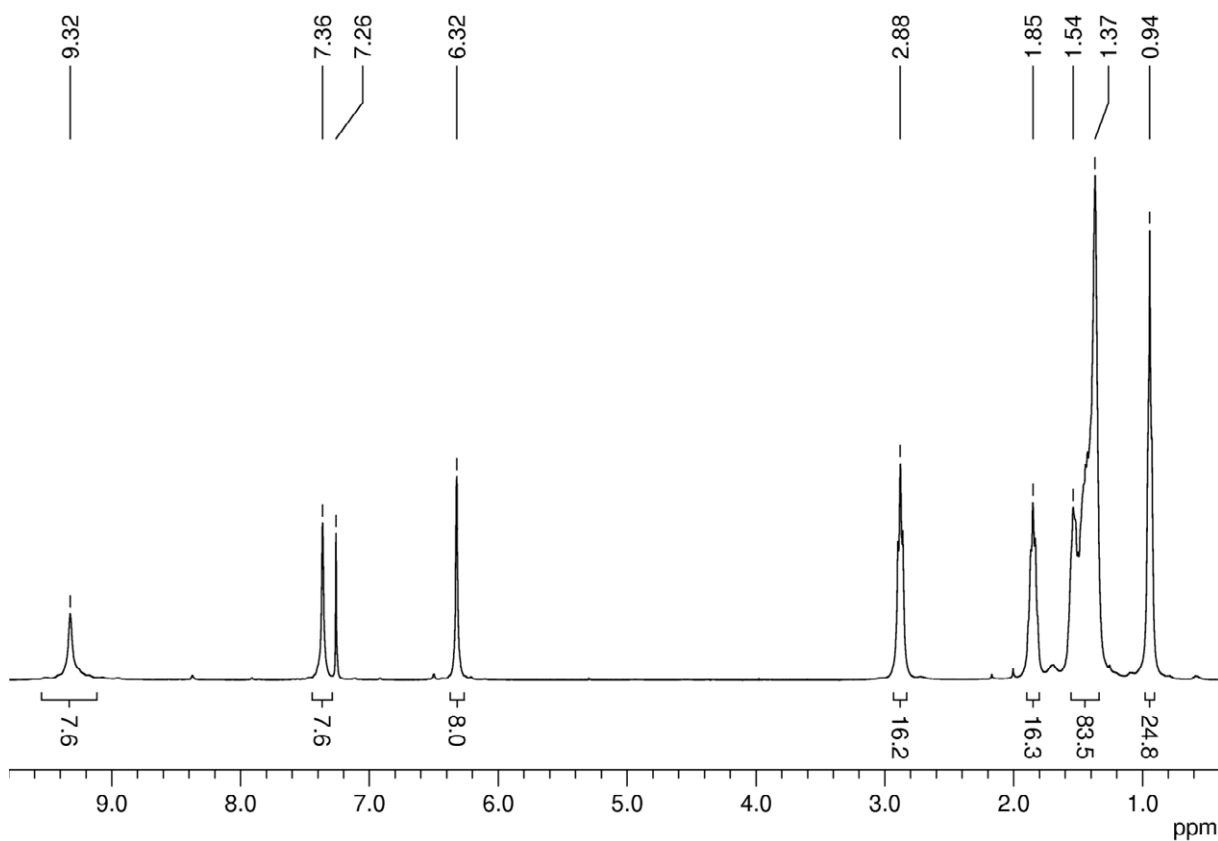

**<sup>13</sup>C-NMR spectrum:**

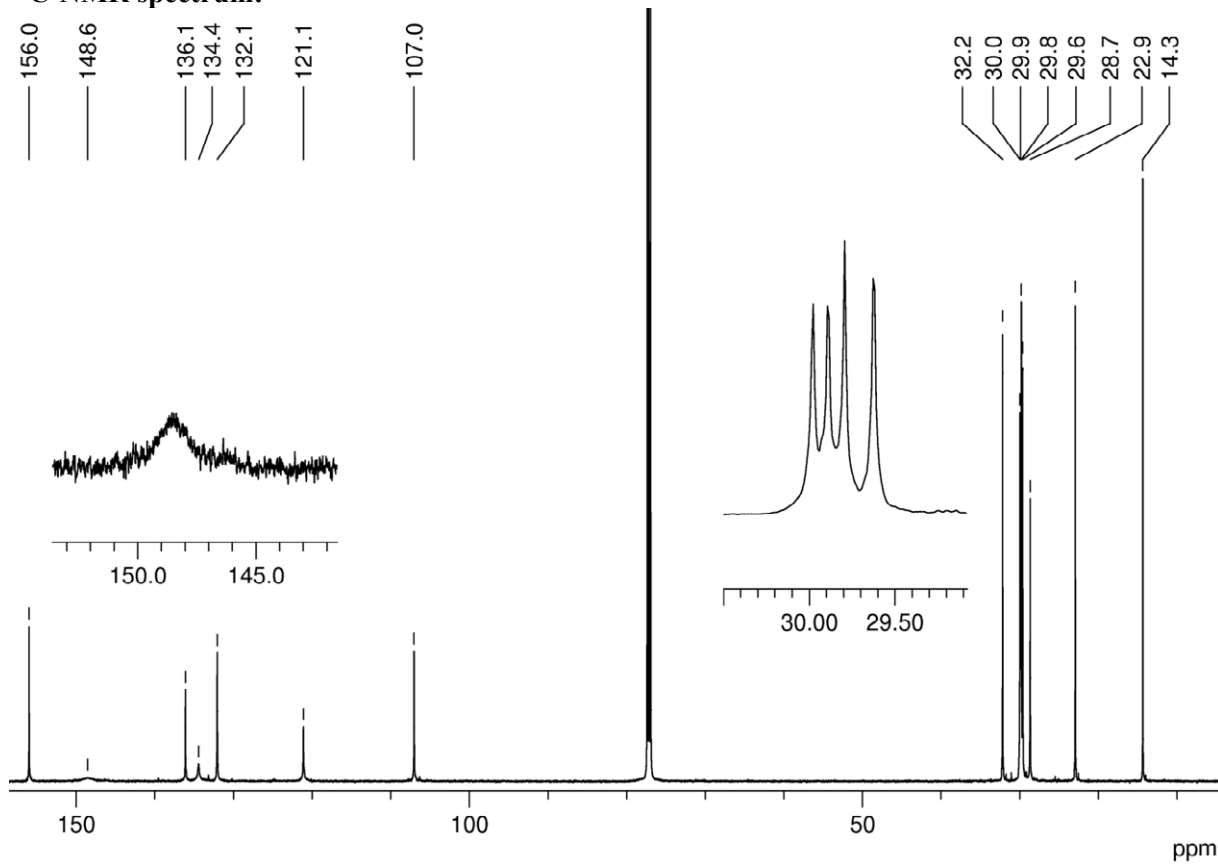

**MALDI-TOF mass spectrum:**

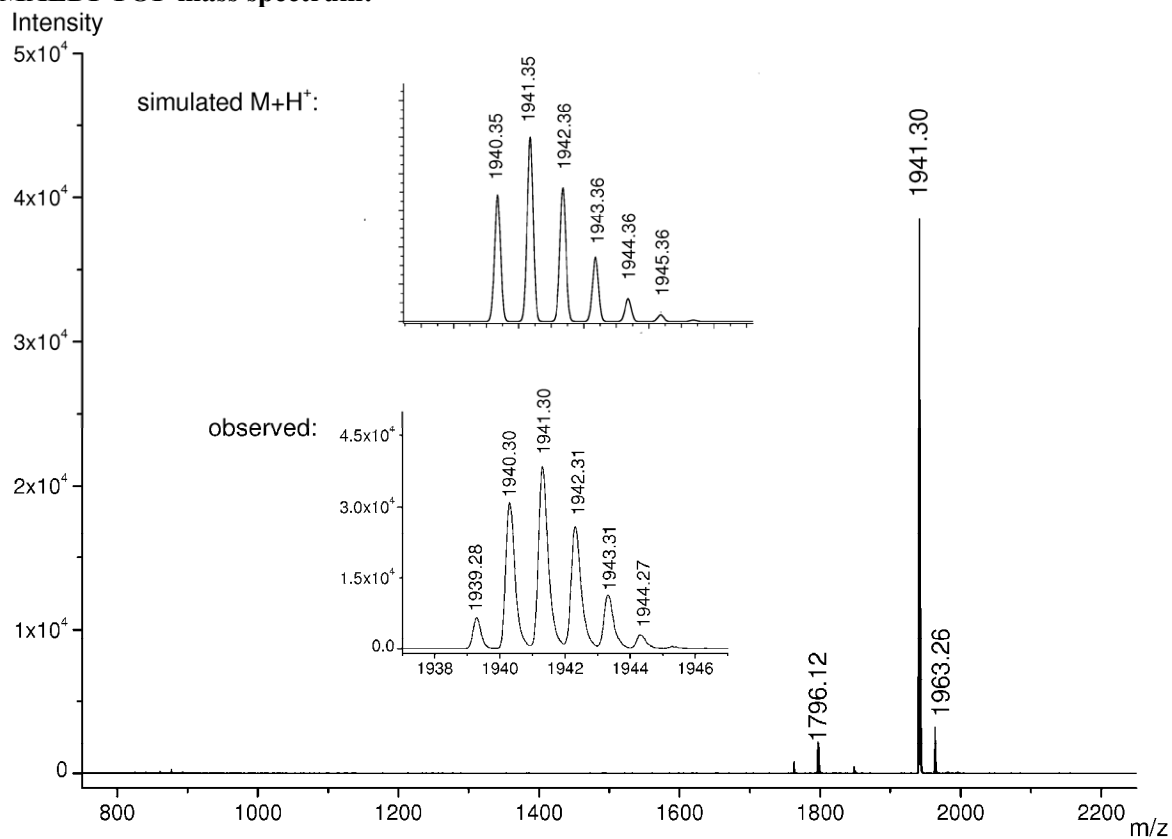

**Compound 4b**

**<sup>1</sup>H-NMR spectrum:**

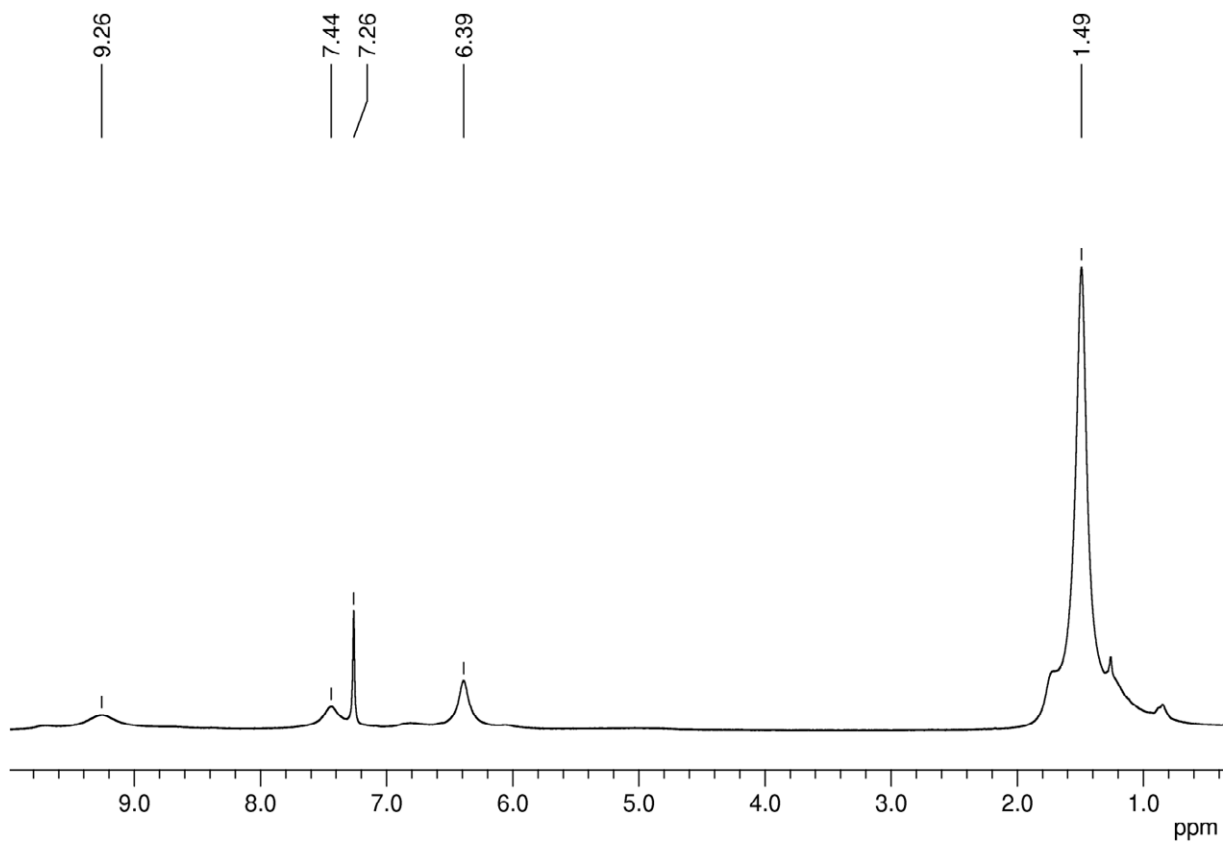

**<sup>13</sup>C-NMR spectrum:**

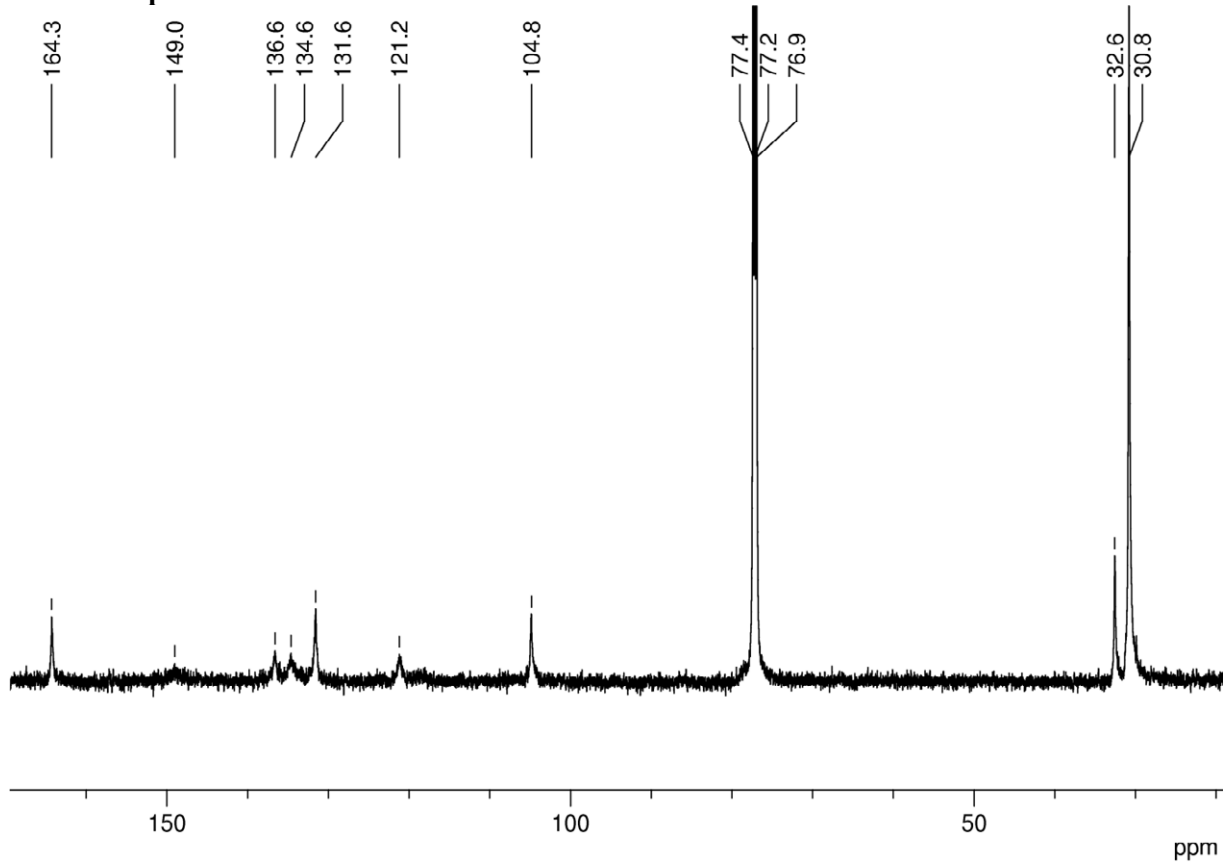

**MALDI-TOF mass spectrum:**

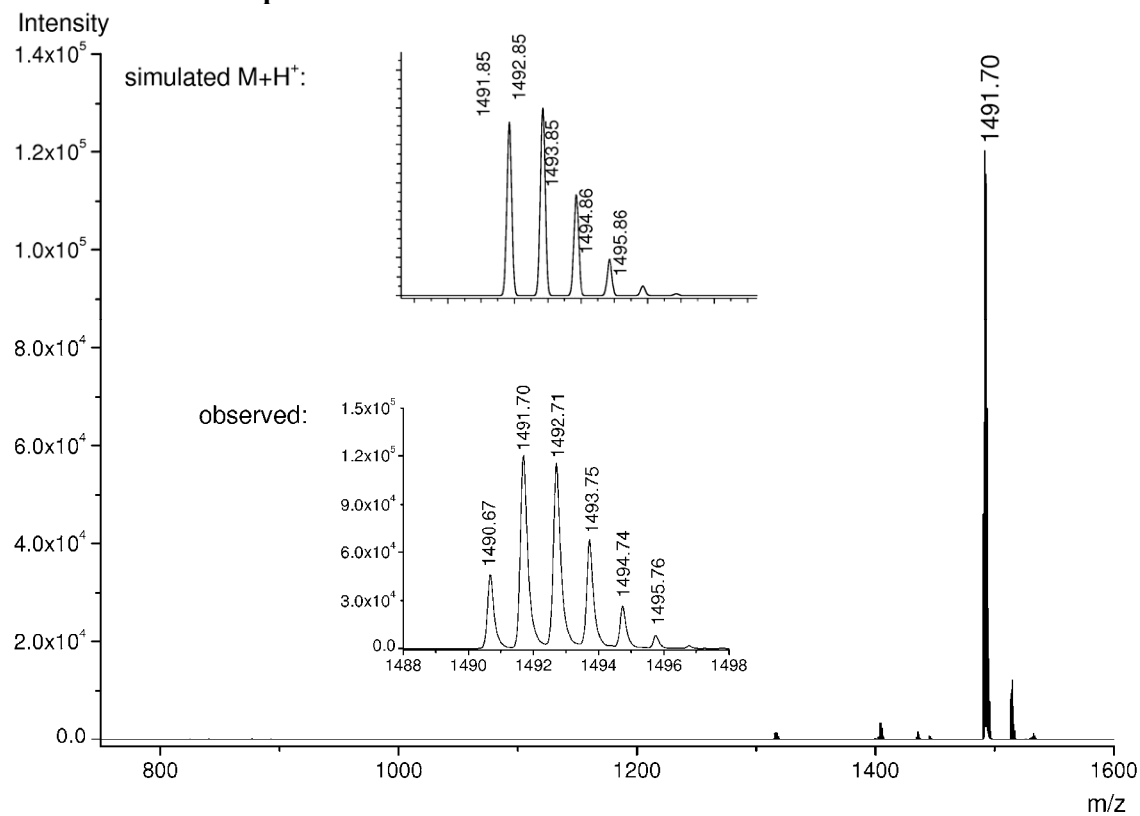

### Compound 5

#### MALDI-TOF mass spectrum:

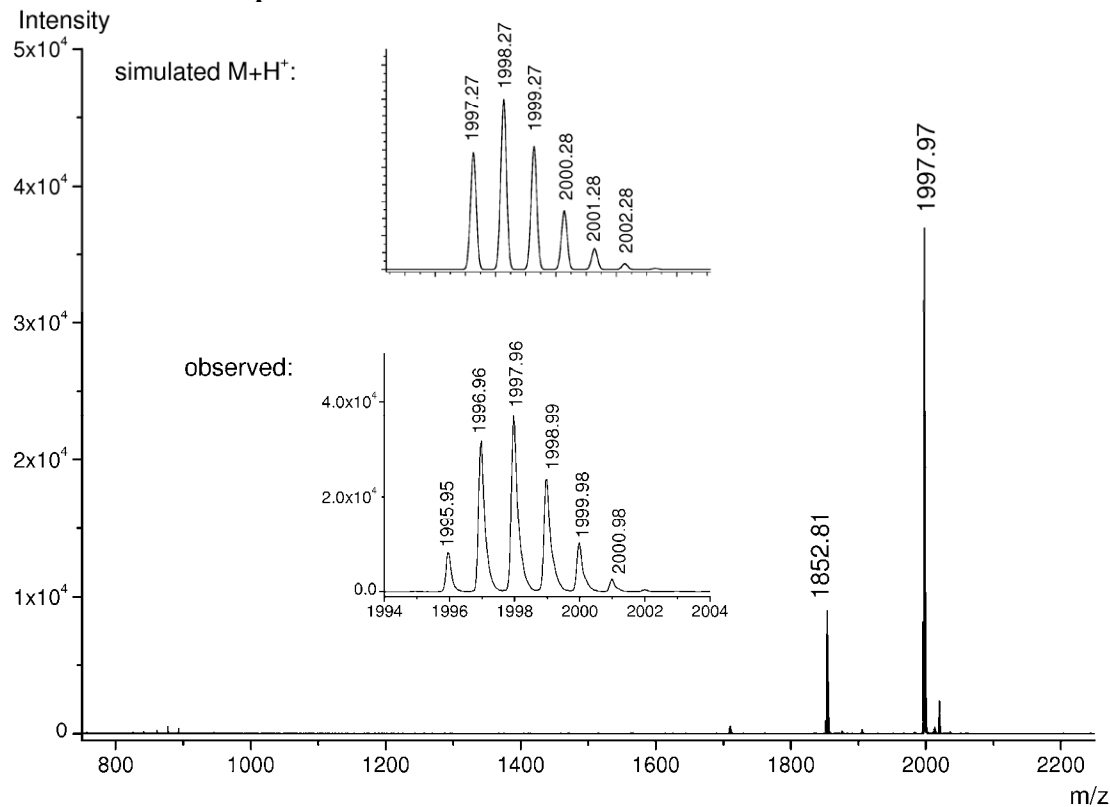

### Compound 6

#### MALDI-TOF mass spectrum:

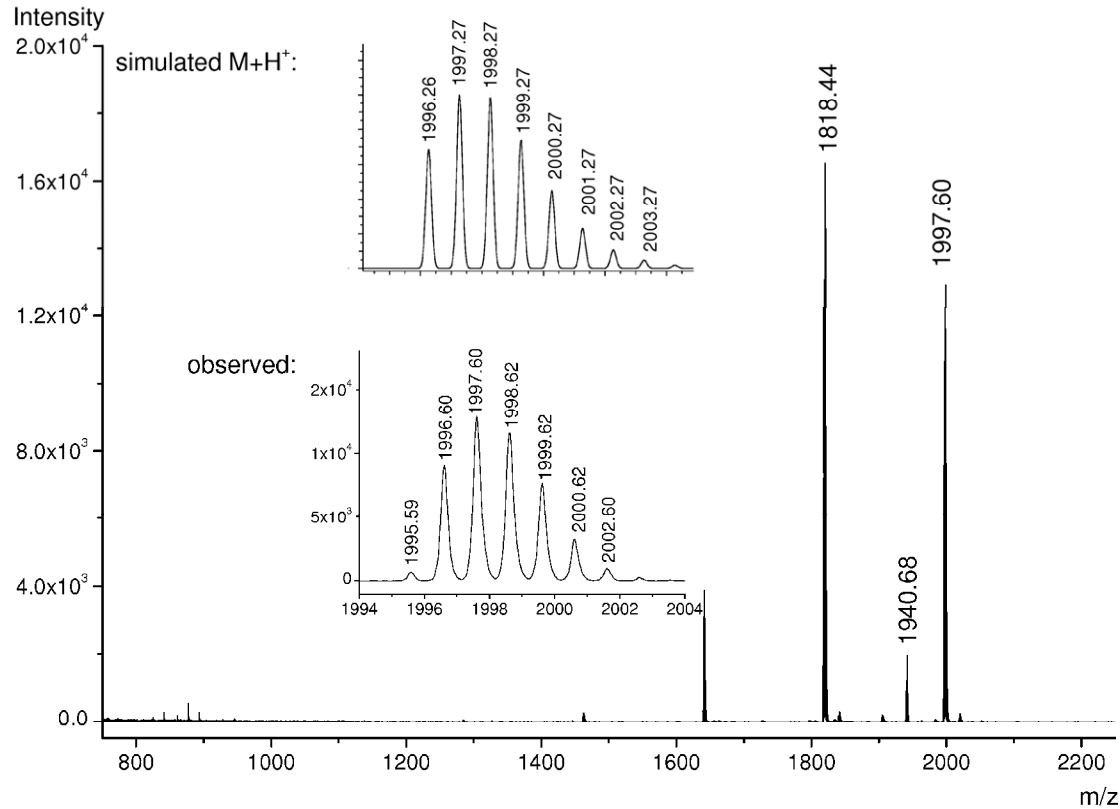



### Compound 7

#### MALDI-TOF mass spectrum:

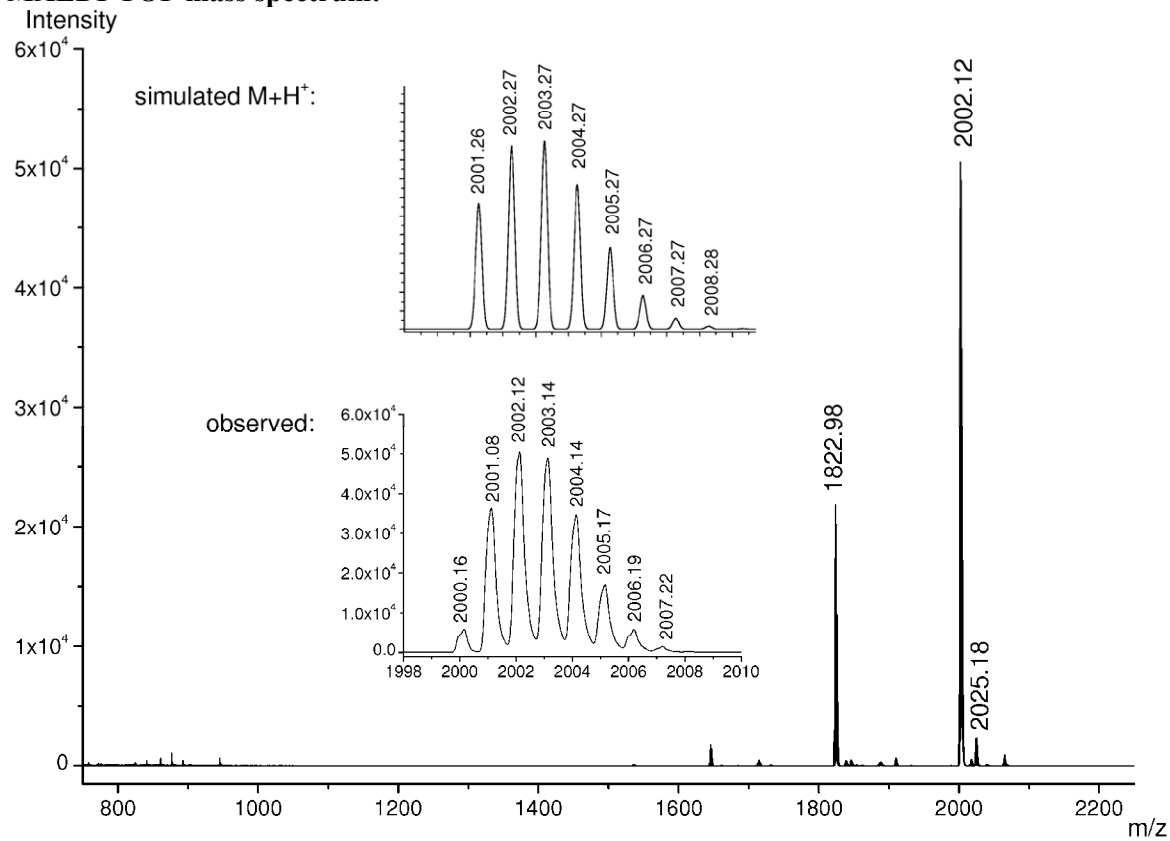

**Compound 8a**

**<sup>1</sup>H-NMR spectrum:**

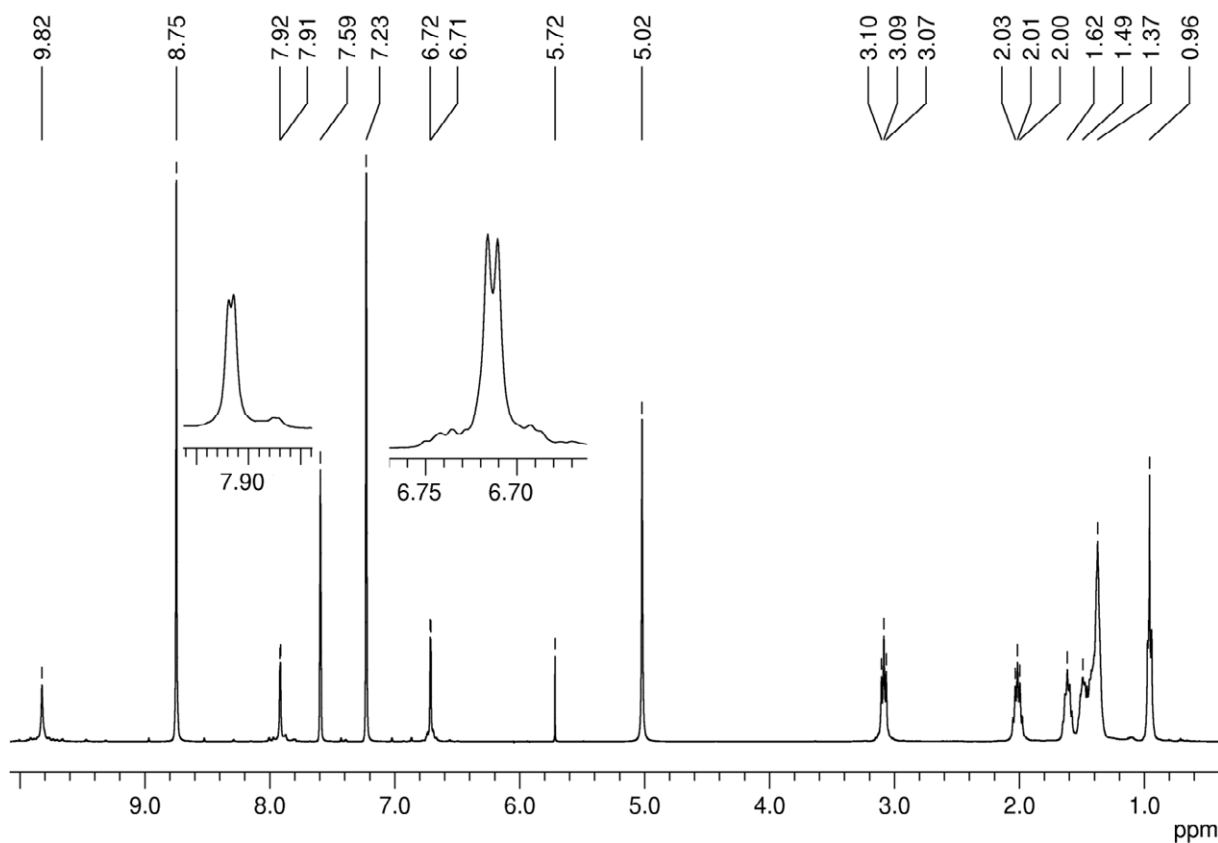

**<sup>13</sup>C-NMR spectrum:**

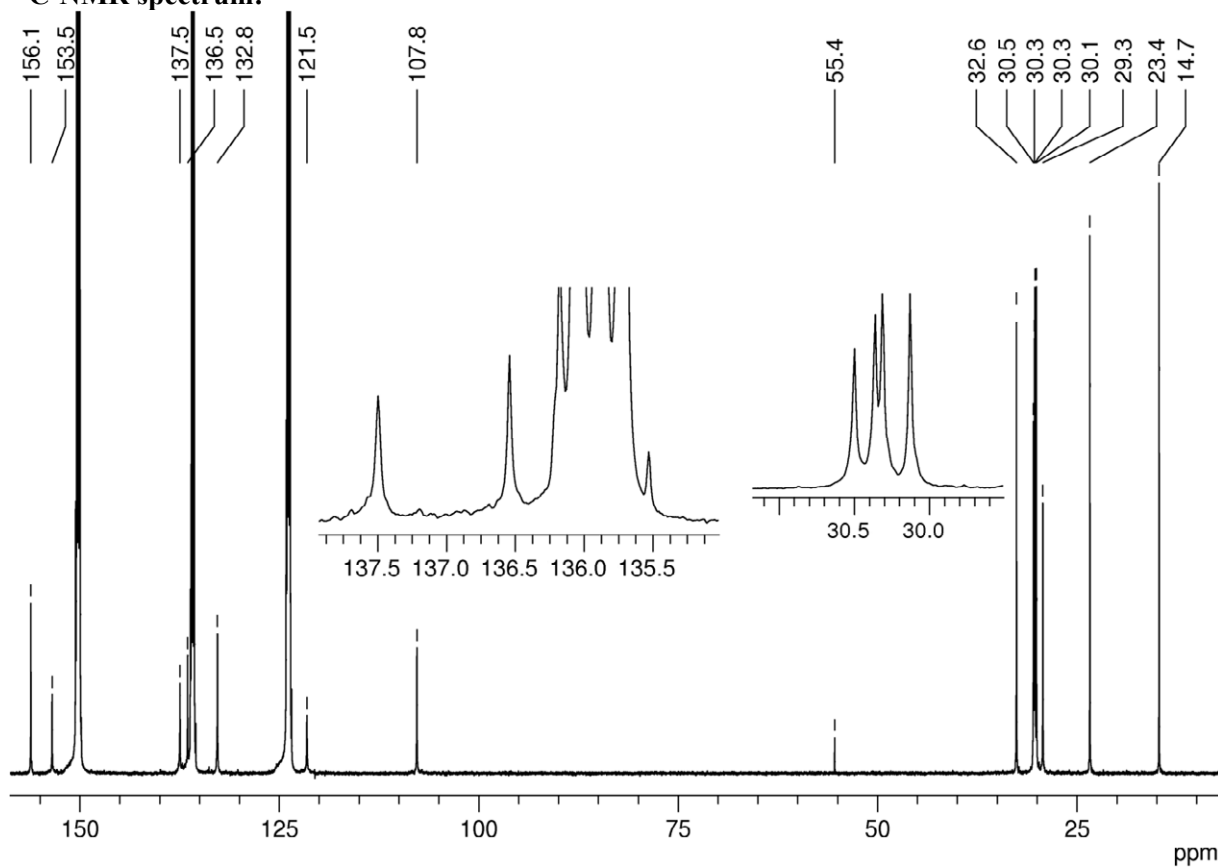

**MALDI-TOF mass spectrum:**

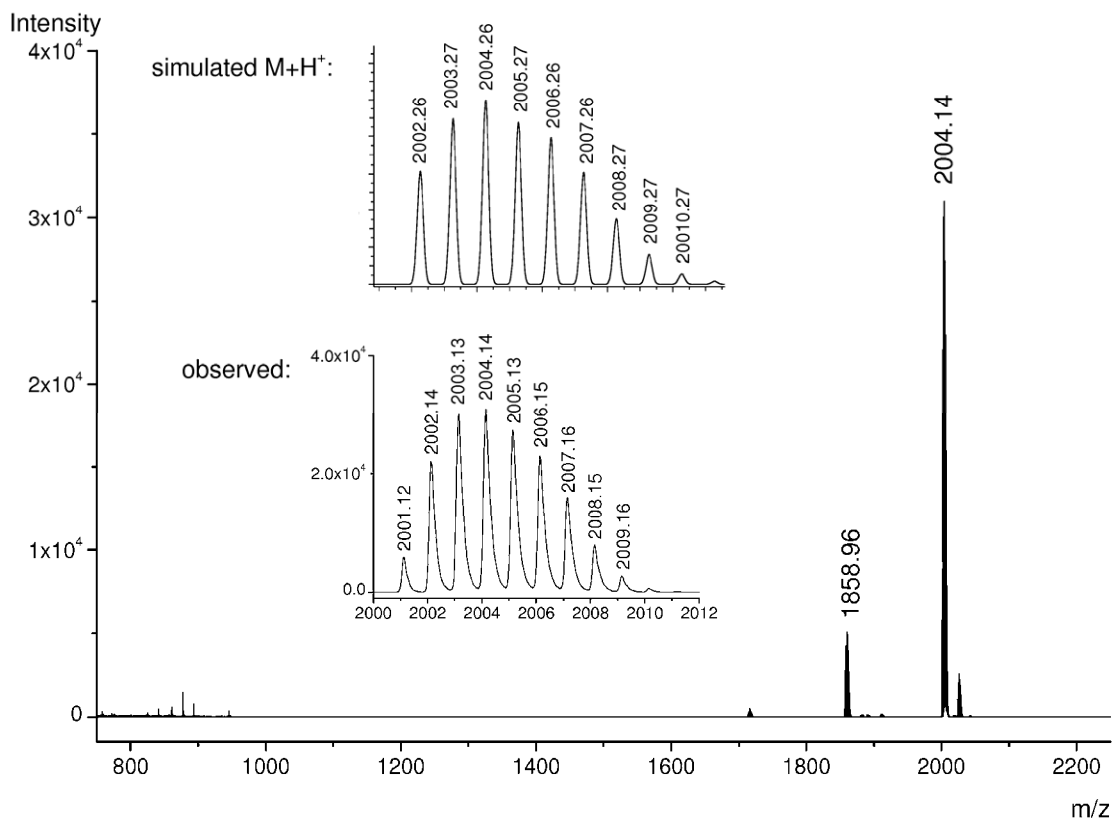

**Compound 8b**

**$^1\text{H-NMR}$  spectrum:**

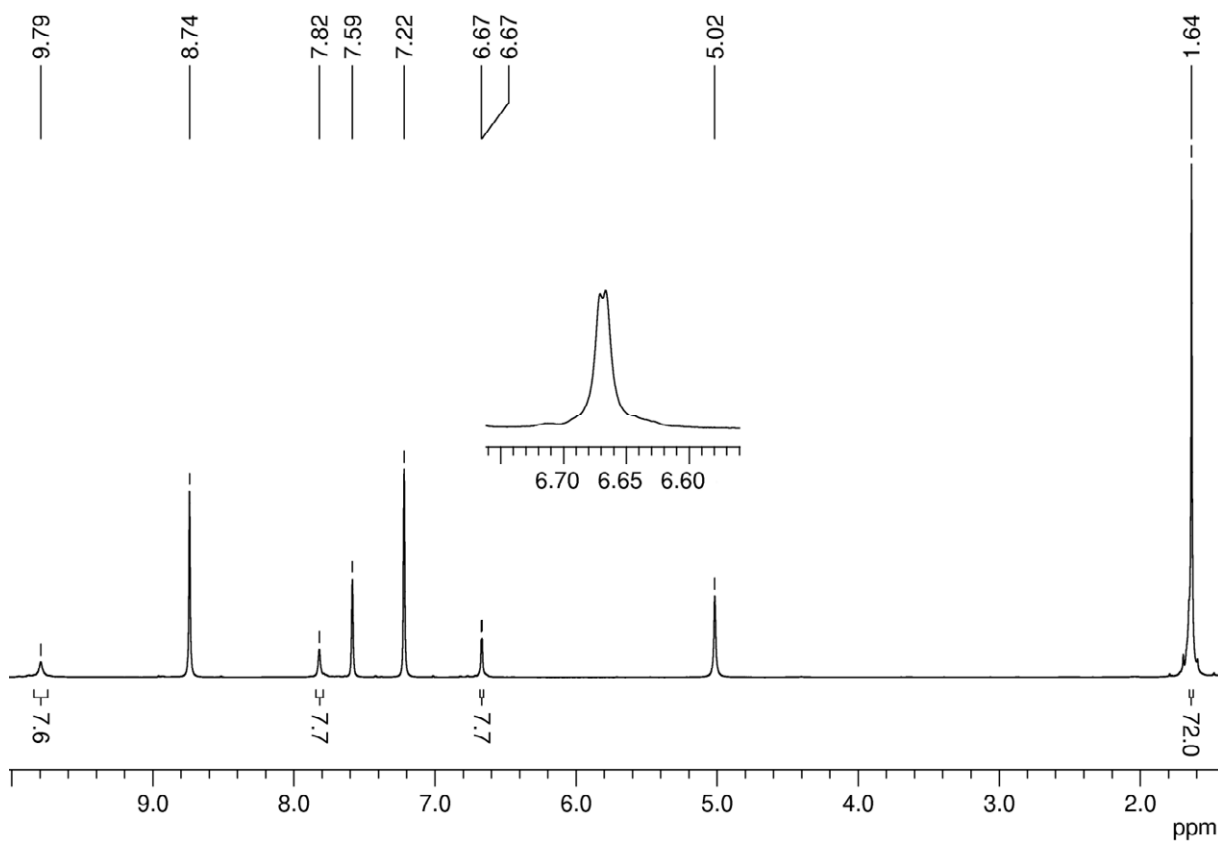

**$^{13}\text{C-NMR}$  spectrum:**

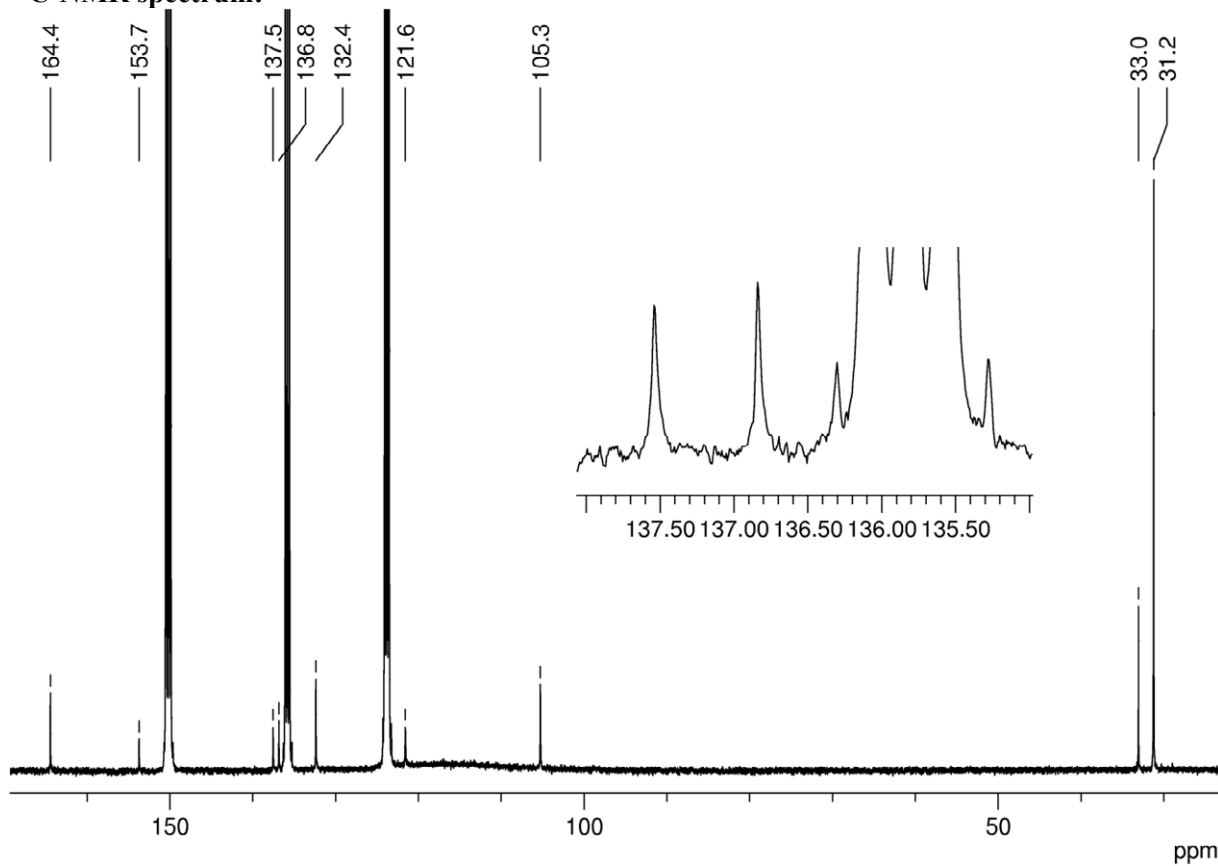

**MALDI-TOF mass spectrum:**

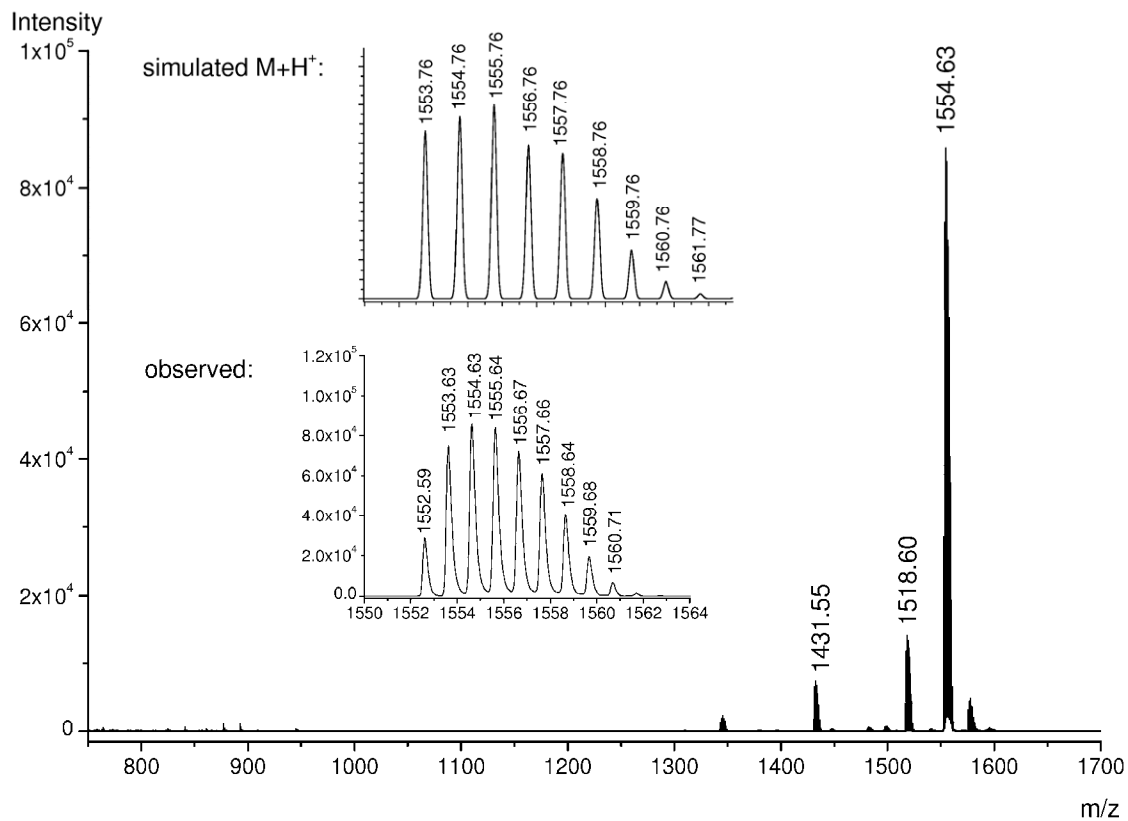

### Compound 9

#### MALDI-TOF mass spectrum:

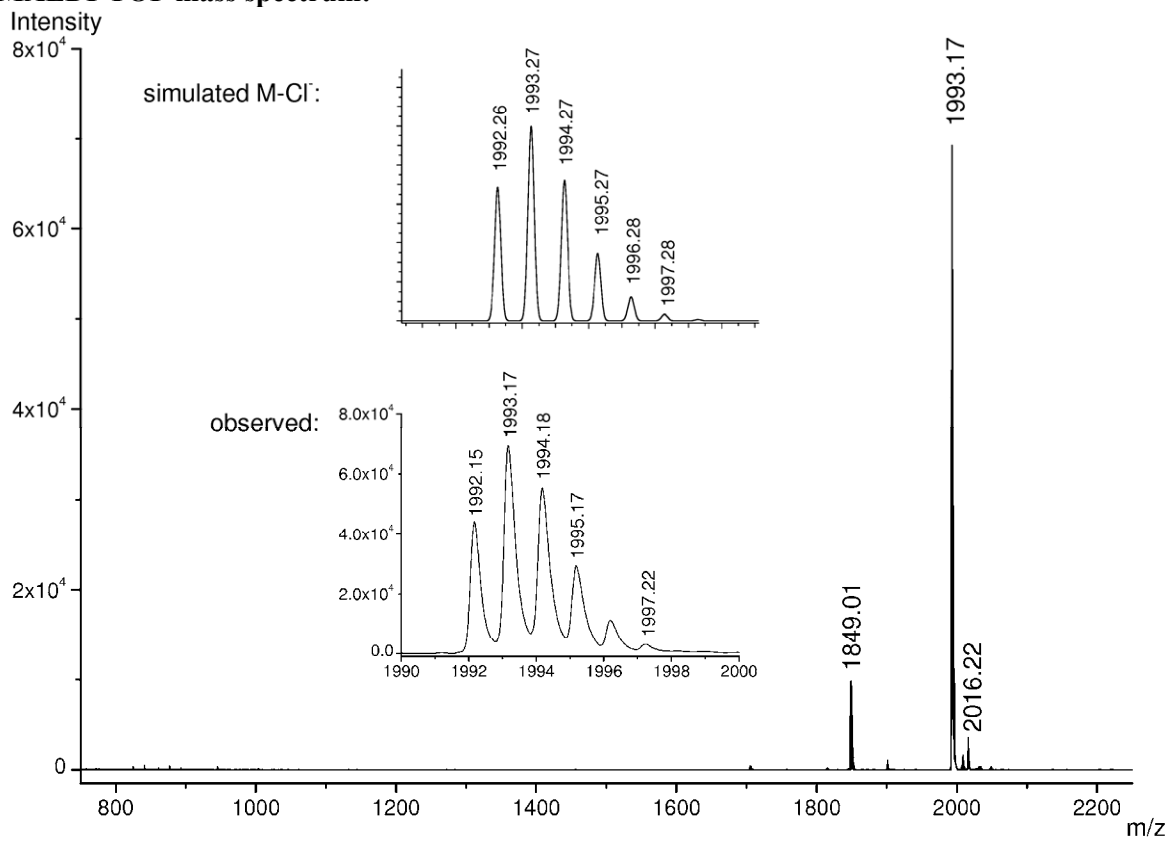

### Compound 10

#### $^1\text{H-NMR}$ spectrum:

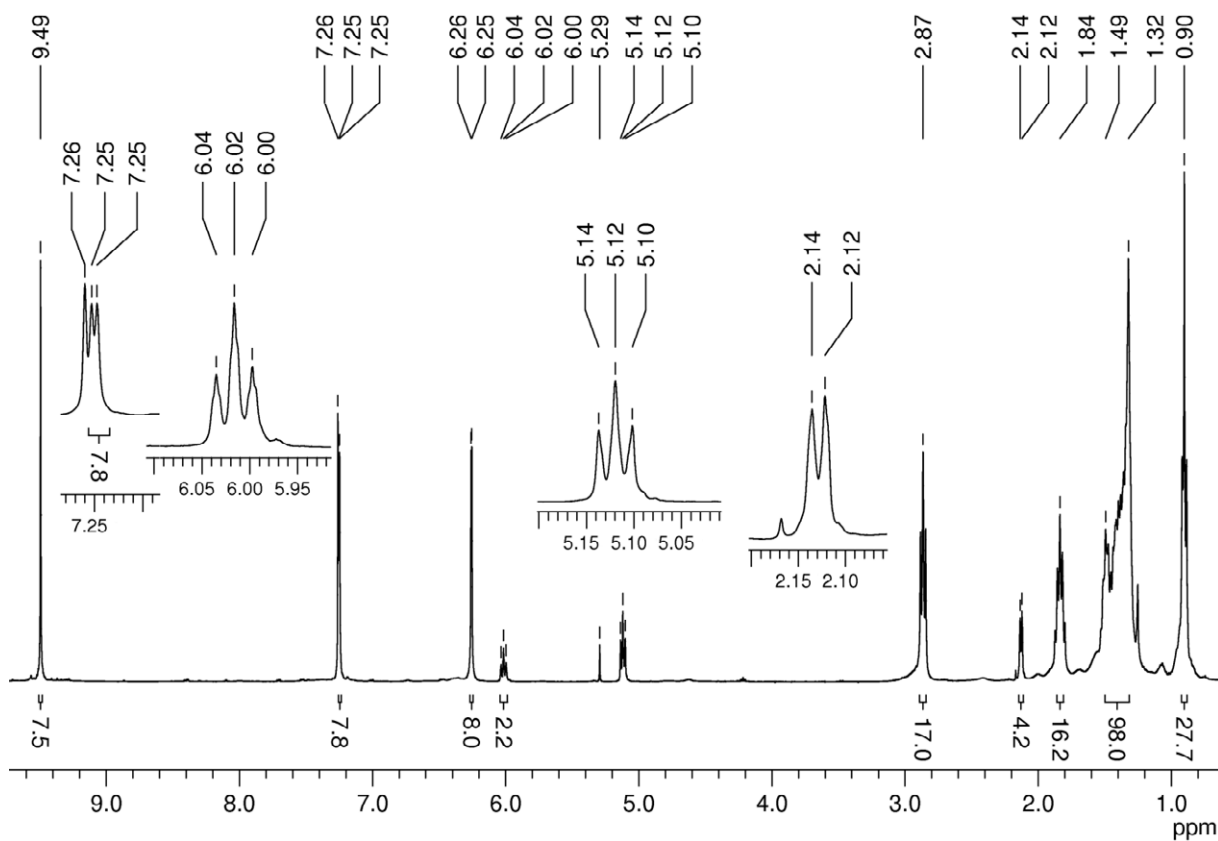

#### $^{13}\text{C-NMR}$ spectrum:

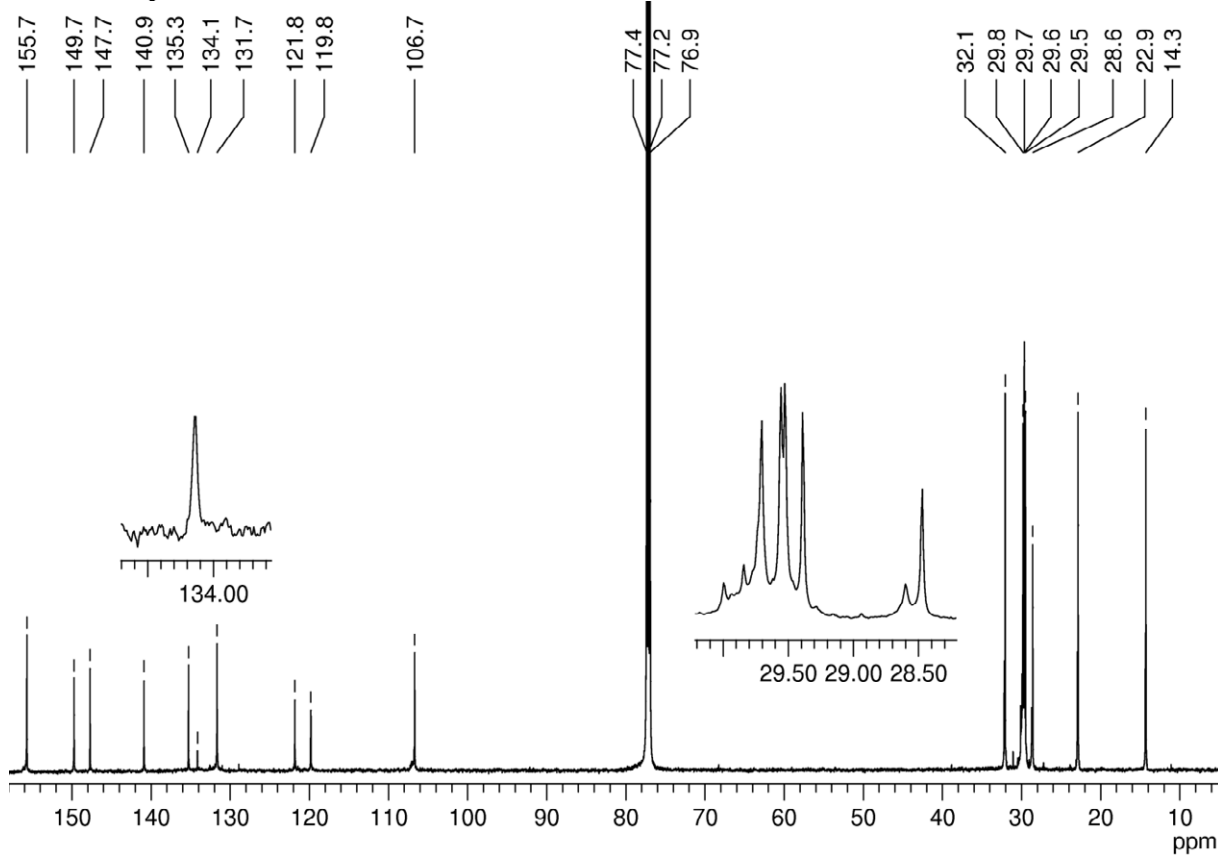

$^1\text{H}$ - $^{13}\text{C}$  HMQC NMR spectrum:

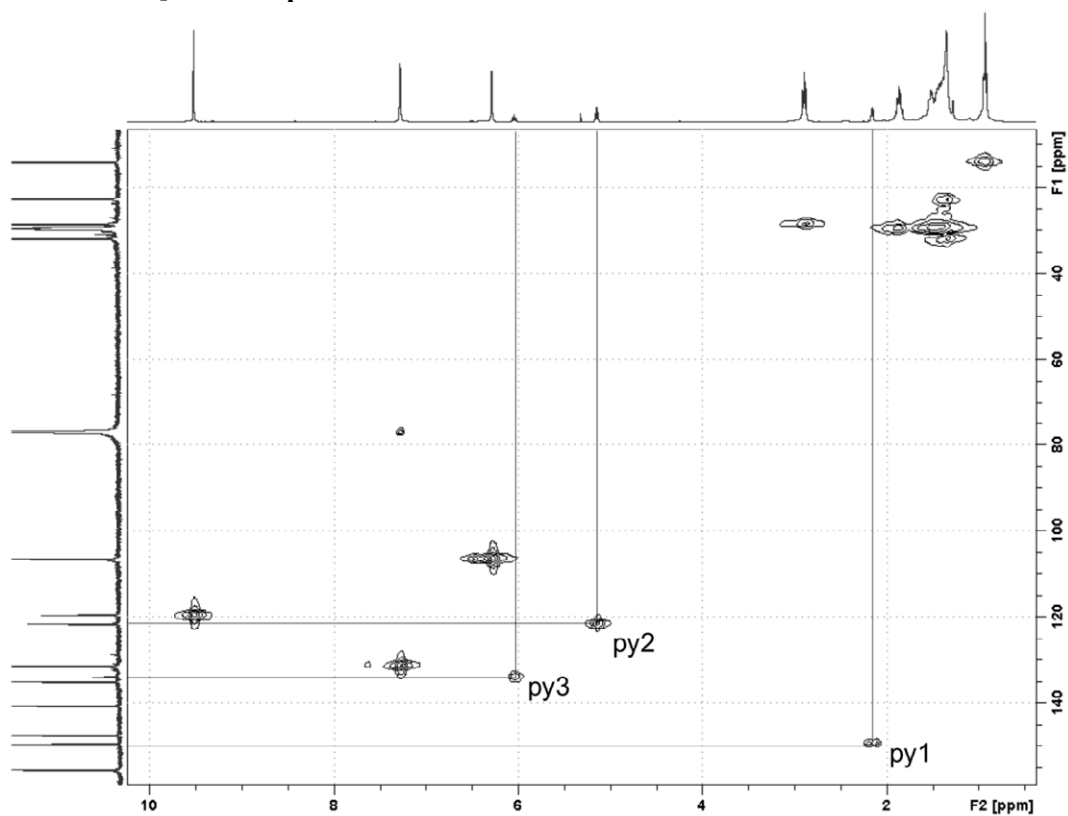

MALDI-TOF mass spectrum:

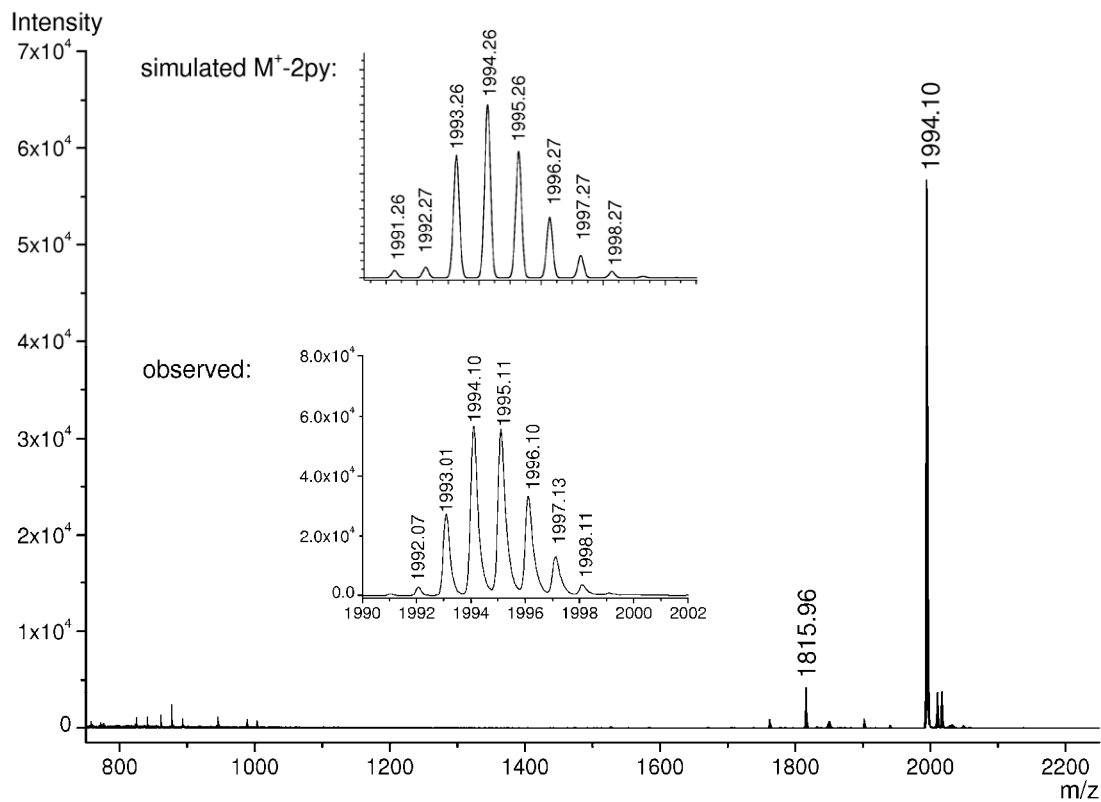

Supplement: b9nj00485h.pdf [file b9nj00485h.pdf]
